# Supplementary material
Source: publisher site journal article supplement (https://www.e-cmh.org/upload/media/cmh-2023-0449-Supplementary-Fig-5.pdf)
Supplement: Supplementary file 1 [file cmh-2023-0449-Supplementary-Fig-5.pdf]

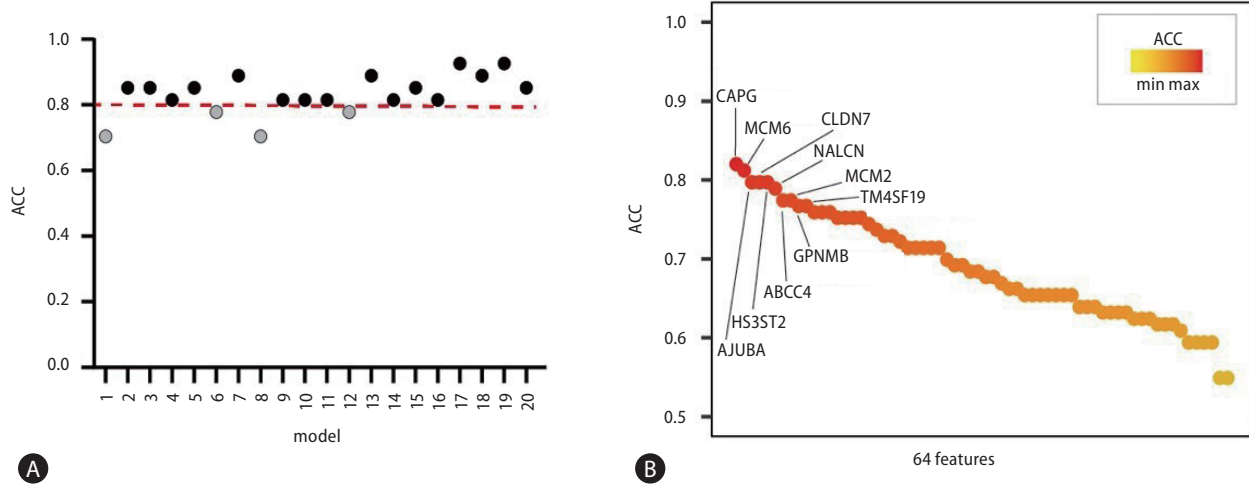

**Supplementary Fig. 5.** Selecting feature process using machine learning modeling. (A) Dot plot showing the accuracy of machine learning models using selected features. (B) Dot plot showing the accuracy of GLM using individual genes for discriminating the stages of MASLD.
